# Supplementary material for: Physicochemical Characterization and Evaluation of Seasonal Variations of Landfill Leachate and Groundwater Quality around Tanjaro Open Dump Area of Sulaymaniyah City, Kurdistan, Iraq
Source: Hindawi journal article supplement (doi:10.1155/2022/8574935), 2022-12-20
Supplement: f1 [file 8574935.f1.docx]

**Physicochemical characterization and evaluation of seasonal variations of landfill leachate and groundwater quality around Tanjaro open-dump area of Sulaymaniyah city, Kurdistan, Iraq**

Sozan W. Rashid1, Dler M. S. Shwan *2, Khsraw A. Rashid3

1,3 [College of Agricultural Engineering Sciences](https://www.google.com/url?q=https%3A%2F%2Fsites.google.com%2Fa%2Funivsul.edu.iq%2Ffaculty-of-agricultural-sciences%2F&sa=D&sntz=1&usg=AOvVaw2TUUnQGbTnbmM-OgQnpiKf), [Departments](http://agr.univsul.edu.iq/College-Departments)‎ of [Natural Resources](http://agr.univsul.edu.iq/College-Departments/soil-and-water-science), University of Sulaimani, 46001, Iraq

2 College of Science, Department of Chemistry, University of Sulaimani, 46001, Iraq

* Correspondence: [dler.salh@univsul.edu.iq](mailto:dler.salh@univsul.edu.iq)

**Supplementary material**

**Table S1: The physicochemical parameter Values of leachate and Ground water (Tube well) samples as well as their seasonal variation**

| **Parameters** | **Seasons** | **L1** | **L2** | **L3** | **W1** | **W2** | **W3** |
| --- | --- | --- | --- | --- | --- | --- | --- |
| **pH** | **Summer** | 6.13 | 7.74 | 7.5 | 7.8 | 6.9 | 6.8 |
| **Autumn** | 6.4 | 8.6 | 8 | 8.4 | 7.4 | 7.3 |
| **Winter** | 5.9 | 8.4 | 8.3 | 8 | 7.4 | 7.4 |
| **Spring** | 5.9 | 7.3 | 7.06 | 8.1 | 8.04 | 7.89 |
| **Temp.** | **Summer** | 28.5 | 19.3 | 21.7 | 23 | 21 | 21.7 |
| **Autumn** | 19 | 10 | 14 | 20.4 | 19.6 | 18.3 |
| **Winter** | 13 | 7 | 8 | 19.2 | 18 | 16.9 |
| **Spring** | 22 | 21.8 | 21.9 | 21.4 | 21 | 21.1 |
| **EC** | **Summer** | 109373.13 | 160716.42 | 451.84 | 898.44 | 810.94 | 650 |
| **Autumn** | 297298.51 | 75850.75 | 582.4 | 1078.13 | 796.88 | 687.5 |
| **Winter** | 86059.7 | 30522.39 | 608 | 859.38 | 828.13 | 687.5 |
| **Spring** | 85328.36 | 40985.08 | 352 | 937.5 | 859.38 | 671.9 |
| **TDS** | **Summer** | 73280 | 107680 | 706 | 575 | 519 | 416 |
| **Autumn** | 199190 | 50820 | 910 | 690 | 510 | 440 |
| **Winter** | 57660 | 20450 | 950 | 550 | 530 | 440 |
| **Spring** | 57170 | 27460 | 550 | 600 | 550 | 430 |
| **TA** | **Summer** | 23600 | 12900 | 800 | 36 | 42 | 32 |
| **Autumn** | 33520 | 15680 | 876 | 204 | 246 | 230 |
| **Winter** | 25600 | 14560 | 760 | 198 | 241 | 225 |
| **Spring** | 50000 | 30000 | 15000 | 660 | 800 | 480 |
| **TH** | **Summer** | 12400 | 5300 | 3400 | 68 | 490 | 434 |
| **Autumn** | 19920 | 12000 | 774 | 118 | 458 | 436 |
| **Winter** | 16000 | 12800 | 751 | 125 | 469 | 447 |
| **Spring** | 40000 | 20000 | 30000 | 220 | 520 | 480 |
| **BOD**5 | **Summer** | 270.6 | 348 | 184.8 | 0.98 | 2.14 | 1.63 |
| **Autumn** | 2169 | 861 | 369 | 1.29 | 0.51 | 0.1 |
| **Winter** | 4554 | 717 | 379.5 | 0.4 | 0.6 | 1.24 |
| **Spring** | 3390 | 11100 | 276 | 1.6 | 3.7 | 3 |
| **COD** | **Summer** | 381.55 | 490.68 | 260.59 | 1.17 | 2.55 | 1.94 |
| **Autumn** | 3470.4 | 1377.6 | 590.4 | 1.54 | 0.61 | 0.12 |
| **Winter** | 7331.94 | 1147.2 | 607.2 | 0.48 | 0.71 | 1.48 |
| **Spring** | 5424 | 18204 | 441.6 | 1.9 | 4.4 | 3.57 |

**Table S1: Continuous**

| **Parameters** | **Seasons** | **L1** | **L2** | **L3** | **W1** | **W2** | **W3** |
| --- | --- | --- | --- | --- | --- | --- | --- |
| **Cl-** | **Summer** | **8300** | **5650** | **240** | **90** | **82** | **63** |
| **Autumn** | **6920** | **13600** | **288** | **109** | **82** | **60** |
| **Winter** | **6950** | **8900** | **294** | **110** | **85** | **65** |
| **Spring** | **15000** | **15500** | **6500** | **30** | **90** | **80** |
| **NO3** | **Summer** | 1153 | 717 | 177 | 7.5 | 15 | 7.3 |
| **Autumn** | 1640 | 3418 | 65.2 | 5.9 | 6.3 | 22 |
| **Winter** | 1504 | 1367 | 478 | 51 | 50 | 52 |
| **Spring** | 4990 | 3589 | 4871 | 14 | 28 | 45 |
| **SO4** | **Summer** | **653** | **265** | **108** | **92** | **84** | **43** |
| **Autumn** | **3510** | **7551** | **238** | **139** | **100** | **47** |
| **Winter** | **1440** | **1120** | **720** | **116** | **88** | **45** |
| **Spring** | **8673** | **11224** | **6887** | **153** | **110** | **84** |
| **PO4** | **Summer** | 27 | 18 | 5 | 0.59 | 0.52 | 0.39 |
| **Autumn** | 40.9 | 110 | 9.2 | 0.39 | 0.55 | 0.38 |
| **Winter** | 37 | 31 | 19.2 | 0.36 | 0.37 | 0.26 |
| **Spring** | 88 | 78 | 79 | 0.31 | 0.3 | 0.3 |
| **Ca** | **Summer** | **4400** | **1280** | **1160** | **22.4** | **151** | **120** |
| **Autumn** | **6400** | **4100** | **172** | **48** | **86** | **86** |
| **Winter** | **6412** | **2560** | **780** | **55** | **94** | **115** |
| **Spring** | **15200** | **7200** | **8800** | **62** | **160** | **144** |
| **Mg** | **Summer** | 2600 | 510 | 121 | 2.8 | 26.8 | 32 |
| **Autumn** | 952 | 388 | 75 | 11 | 20 | 20 |
| **Winter** | 961 | 371 | 77 | 9 | 19.7 | 22.5 |
| **Spring** | 486 | 486 | 1944 | 15 | 29 | 29.1 |
| **Na** | **Summer** | **375** | **1000** | **100** | **8** | **5** | **3** |
| **Autumn** | **7000** | **17000** | **300** | **110** | **67** | **67** |
| **Winter** | **800** | **720** | **200** | **66** | **38** | **16** |
| **Spring** | **10000** | **8750** | **2500** | **75** | **35** | **17** |
| **K** | **Summer** | 620 | 1250 | 8 | 0.16 | 0.56 | 0.48 |
| **Autumn** | 3600 | 5000 | 1260 | 2.6 | 10.3 | 10.3 |
| **Winter** | 304 | 233 | 28.8 | 0.72 | 2.6 | 0.64 |
| **Spring** | 2500 | 2000 | 30 | 0.76 | 2.08 | 1.32 |

**Table S1: Continuous**

| **Parameters** | **Seasons** | **L1** | **L2** | **L3** | **W1** | **W2** | **W3** |
| --- | --- | --- | --- | --- | --- | --- | --- |
| **Cr** | **Summer** | **1.4** | **4.88** | **0.02** | **Nil.** | **Nil.** | **Nil.** |
| **Autumn** | **0.2** | **0.39** | **0.01** | **Nil.** | **Nil.** | **Nil.** |
| **Winter** | **0.18** | **0.16** | **0.01** | **Nil.** | **Nil.** | **Nil.** |
| **Spring** | **0.35** | **1.05** | **0.01** | **Nil.** | **Nil.** | **Nil.** |
| **Mn** | **Summer** | 43.1 | 4.88 | 0.07 | Nil. | Nil. | Nil. |
| **Autumn** | 100.17 | 0.39 | 1.77 | Nil. | Nil. | Nil. |
| **Winter** | 100.25 | 0.16 | 0.37 | Nil. | Nil. | Nil. |
| **Spring** | 52.61 | 1.05 | 0.08 | Nil. | Nil. | Nil. |
| **Fe** | **Summer** | **152.15** | **24.67** | **0.01** | **0** | **0** | **0** |
| **Autumn** | **40.78** | **11.55** | **0.33** | **0.01** | **0.01** | **0.03** |
| **Winter** | **39.64** | **6.52** | **0.2** | **0.03** | **0** | **0.02** |
| **Spring** | **101.23** | **14.86** | **0.03** | **0.2** | **0.06** | **0** |
| **Co** | **Summer** | 0.41 | 0.73 | 0 | Nil. | Nil. | Nil. |
| **Autumn** | 0.12 | 0.05 | 0 | Nil. | Nil. | Nil. |
| **Winter** | 0.07 | 0.02 | 0 | Nil. | Nil. | Nil. |
| **Spring** | 0.615 | 0.2 | 0 | Nil. | Nil. | Nil. |
| **Ni** | **Summer** | **2.33** | **4.1** | **0.01** | **Nil.** | **Nil.** | **Nil.** |
| **Autumn** | **0.35** | **0.25** | **0.01** | **Nil.** | **Nil.** | **Nil.** |
| **Winter** | **0.28** | **0.11** | **0.01** | **Nil.** | **Nil.** | **Nil.** |
| **Spring** | **2.2** | **0.91** | **0.02** | **Nil.** | **Nil.** | **Nil.** |
| **Cu** | **Summer** | 0.01 | 0.37 | 0 | Nil. | Nil. | Nil. |
| **Autumn** | 0.02 | 0.11 | 0 | Nil. | Nil. | Nil. |
| **Winter** | 0.02 | 0.07 | 0 | Nil. | Nil. | Nil. |
| **Spring** | 0.11 | 0.44 | 0 | Nil. | Nil. | Nil. |
| **Zn** | **Summer** | **1.69** | **3.72** | **0.01** | **0** | **0** | **0** |
| **Autumn** | **0.91** | **1.71** | **0.44** | **0.18** | **0.29** | **0.08** |
| **Winter** | **0.44** | **0.92** | **0.09** | **0.05** | **0.05** | **0.12** |
| **Spring** | **0.69** | **0.89** | **0.11** | **0.19** | **0.03** | **0.01** |
| **As** | **Summer** | 0.01 | 0.37 | 0 | Nil. | Nil. | Nil. |
| **Autumn** | 0.01 | 0.17 | 0 | Nil. | Nil. | Nil. |
| **Winter** | 0.03 | 0.05 | 0 | Nil. | Nil. | Nil. |
| **Spring** | 0.1 | 0.13 | 0 | Nil. | Nil. | Nil. |

**Table S1: Continuous**

| **Parameters** | **Seasons** | **L1** | **L2** | **L3** | **W1** | **W2** | **W3** |
| --- | --- | --- | --- | --- | --- | --- | --- |
| **Cd** | **Summer** | **Nil.** | **Nil.** | **Nil.** | **Nil.** | **Nil.** | **Nil.** |
| **Autumn** | **Nil.** | **Nil.** | **Nil.** | **Nil.** | **Nil.** | **Nil.** |
| **Winter** | **Nil.** | **Nil.** | **Nil.** | **Nil.** | **Nil.** | **Nil.** |
| **Spring** | **Nil.** | **Nil.** | **Nil.** | **Nil.** | **Nil.** | **Nil.** |
| **Hg** | **Summer** | Nil. | Nil. | Nil. | Nil. | Nil. | Nil. |
| **Autumn** | Nil. | Nil. | Nil. | Nil. | Nil. | Nil. |
| **Winter** | Nil. | Nil. | Nil. | Nil. | Nil. | Nil. |
| **Spring** | Nil. | Nil. | Nil. | Nil. | Nil. | Nil. |
